# Supplementary material for: Genome-Wide Identification of the Soybean LysM-RLK Family Genes and Its Nitrogen Response
Source: MDPI journal article supplement (doi:10.3390/ijms241713621), 2023-09-03
Supplement: s1 [file s1]

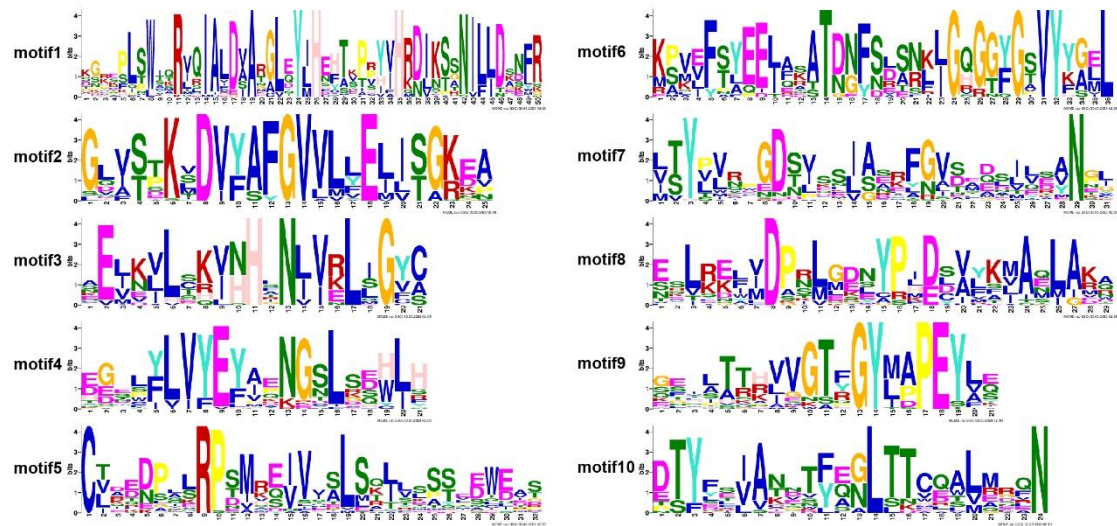

**Figure S1. Converted motif of soybean LysM-RLK amino acid sequences.** The converted motifs of LysM-RLK proteins were analyzed by the MEME online program. The character and size of each logo indicates the relative abundance of each nucleotide in the sequence.

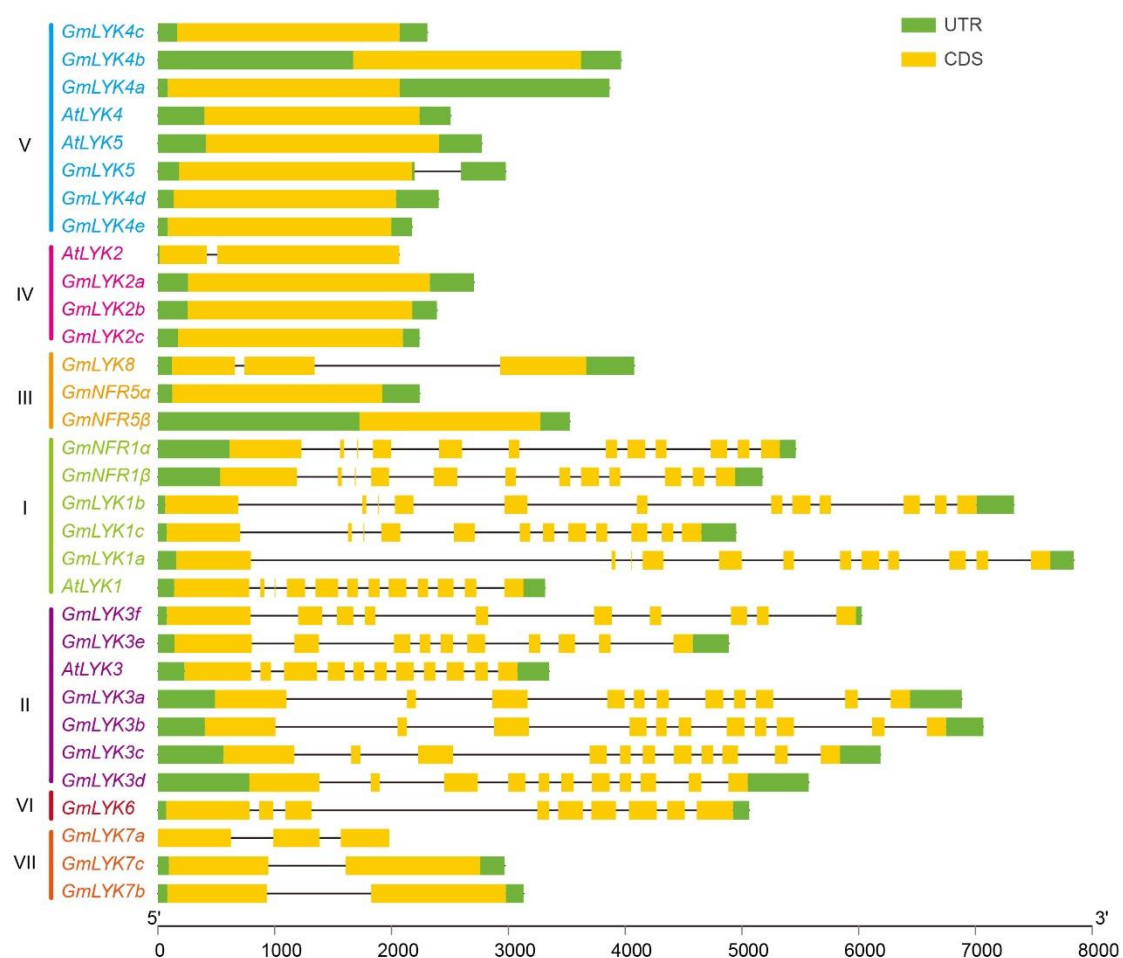

**Figure S2. Gene structures of LysM-RLK genes from soybean and Arabidopsis.**

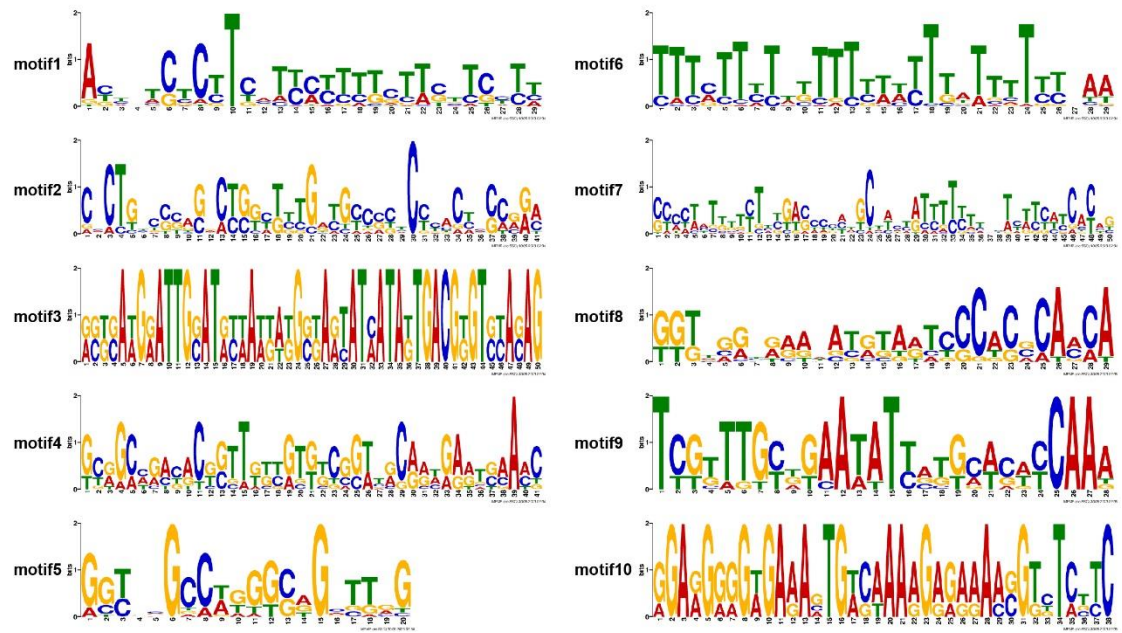

**Figure S3. Conserved motif on the promoter sequences of soybean *LysM-RLK* genes.** The converted motifs identified from the promoters of *LysM-RLKs* were obtained from MEME analysis. The character and size of each logo indicates the relative abundance of each nucleotide in the sequence.
