# Supplementary material for: Genome-Wide Identification of the Soybean LysM-RLK Family Genes and Its Nitrogen Response
Source: Int J Mol Sci. 2023 Sep 3;24(17):13621. doi: 10.3390/ijms241713621 (PMC10487828; doi:10.3390/ijms241713621)
Supplement: Supplementary file 1 [file ijms-24-13621-s001.zip › Supplementary table.xlsx]

## Sheet: TableS1
Table S1. The sequence analysis and identification of the LysM-RLK family proteins.
gene ID	Gene name	CDS length (bp)	Amino acid length (aa)	PI	NW(KDa)	Localization
Glyma.11G063200	GmLYK4c	1905	634	6.92	70.688	Chr11:4784433..4786338 reverse
Glyma.01G179000	GmLYK4b	1950	649	6.45	72.408	Chr01:51506808..51509532 forward
Glyma.02G059700	GmLYK4a	1983	660	5.25	72.79	Chr02:5377613..5379882 forward
Glyma.02G269600	GmLYK5	1941	646	5.42	70.681	Chr02:45381937..45383930 forward
Glyma.17G247800	GmLYK4d	1902	633	7.48	70.467	Chr17:40315005..40316907 reverse
Glyma.14G077700	GmLYK4e	1911	636	8.17	70.794	Chr14:6572515..6574608 forward
Glyma.19G088300	GmLYK2a	2070	689	5.56	76.078	Chr19:31430956..31433844 reverse
Glyma.11G196800	GmLYK2b	1866	621	5.71	69.231	Chr11:27106028..27107951 reverse
Glyma.12G077500	GmLYK2c	1860	619	6.22	69.23	Chr12:6021650..6025927 forward
Glyma.02G000400	GmLYK8	1878	625	5.37	68.821	Chr02:40098..44249 forward
Glyma.11G063100	GmNFR5α	1797	598	5.64	66.362	Chr11:4779591..4781813 forward
Glyma.01G179100	GmNFR5β	1548	515	6.28	57.071	Chr01:51511245..51514855 reverse
Glyma.02G270800	GmNFR1α	1836	611	5.69	67.158	Chr02:45475465..45480930 forward
Glyma.14G046200	GmNFR1β	1815	604	5.41	66.409	Chr14:3515947..3520547 reverse
Glyma.20G054500	GmLYK1b	1857	618	5.13	67.702	Chr20:12620349..12627658 forward
Glyma.02G270700	GmLYK1c	1842	613	5.27	67.225	Chr02:45468742..45473722 forward
Glyma.15G111300	GmLYK1a	1884	627	6.2	68.43	Chr15:8714066..8721869 reverse
Glyma.08G283300	GmLYK3f	1848	615	5.88	69.05	Chr08:38947604..38953455 forward
Glyma.01G027100	GmLYK3e	1860	619	5.21	69.131	Chr01:2841568..2846006 forward
Glyma.07G015300	GmLYK3a	2004	667	6.15	73.873	Chr07:1208760..1215579 forward
Glyma.08G200800	GmLYK3b	1998	665	6.05	73.339	Chr08:16246815..16253923 forward
Glyma.15G019800	GmLYK3c	1983	660	5.89	72.953	Chr15:1540654..1547540 reverse
Glyma.13G354400	GmLYK3d	1962	653	5.88	71.656	Chr13:44281121..44286455 forward
Glyma.13G358900	GmLYK6	2283	760	8.52	84.586	Chr13:44635508..44640482 reverse
Glyma.18G239700	GmLYK7a	1728	575	8.32	64.027	Chr18:52842314..52844380 forward
Glyma.09G253200	GmLYK7c	2001	666	8.23	74.29	Chr09:47309777..47312674 reverse
Glyma.18G239600	GmLYK7b	2004	667	6.93	74.176	Chr18:52837346..52840571 forward
AT3G21630	AtLYK1/ATCERK1	1854	617	6.79	67.314	Chr3:296582 .. 298648 reverse
AT3G01840	AtLYK2	1965	654	6.18	73.161	Chr3:7615357 .. 7618671 reverse
AT1G51940	AtLYK3	1956	651	6.28	71.443	Chr1:19295820 .. 19299169 reverse
AT2G23770	AtLYK4	1839	612	5.13	66.618	Chr2:10119973 .. 10122479 reverse
AT2G33580	AtLYK5	1995	664	5.84	72.568	Chr2: 14219481 .. 14222254reverse

## Sheet: TableS2
Table S2.The syntenic gene pairs
AT2G23770 match Glyma.01G179000
AT2G23770 match Glyma.02G059700
AT2G23770 match Glyma.11G063100
AT3G01840 match Glyma.19G088300
Glyma.01G027100 match Lj2g0016247
Glyma.01G027100 match Lj4g0021993
Glyma.01G179000 match Lj1g0002973
Glyma.01G179000 match Lj2g0020318
Glyma.01G179000 match Lj4g0023287
Glyma.02G059700 match Lj1g0002973
Glyma.02G059700 match Lj2g0020318
Glyma.02G059700 match Lj4g0023287
Glyma.08G200800 match Lj3g0014594
Glyma.08G200800 match Lj3g0004102
Glyma.08G283300 match Lj2g0016247
Glyma.08G283300 match Lj4g0021993
Glyma.09G253200 match Lj1g0000514
Glyma.11G063100 match Lj1g0002973
Glyma.11G063100 match Lj2g0020318
Glyma.11G063100 match Lj4g0023287
Glyma.11G196800 match Lj3g0001144
Glyma.12G077500 match Lj3g0001144
Glyma.13G354400 match Lj3g0004102
Glyma.13G354400 match Lj3g0014594
Glyma.13G358900 match Lj3g0023389
Glyma.14G077700 match Lj1g0002973
Glyma.14G077700 match Lj2g0020318
Glyma.15G019800 match Lj3g0004102
Glyma.15G019800 match Lj3g0014594
Glyma.15G111300 match Lj6g0011405
Glyma.17G247800 match Lj1g0002973
Glyma.17G247800 match Lj2g0020318
Glyma.18G239600 match Lj1g0000514
Glyma.19G088300 match Lj1g0006126
Medtr5g033490 match Glyma.01G027100
Medtr1g021845 match Glyma.01G179000
Medtr5g019040 match Glyma.01G179000
Medtr1g021845 match Glyma.02G059700
Medtr5g019040 match Glyma.02G059700
Medtr8g078300 match Glyma.02G059700
Medtr3g080170 match Glyma.02G269600
Medtr5g085790 match Glyma.02G269600
Medtr8g014500 match Glyma.08G200800
Medtr5g033490 match Glyma.08G283300
Medtr7g079320 match Glyma.09G253200
Medtr1g021845 match Glyma.11G063100
Medtr5g019040 match Glyma.11G063100
Medtr8g078300 match Glyma.11G063100
Medtr4g058570 match Glyma.11G196800
Medtr4g058570 match Glyma.12G077500
Medtr8g014500 match Glyma.13G354400
Medtr1g021845 match Glyma.14G077700
Medtr5g019040 match Glyma.14G077700
Medtr8g078300 match Glyma.14G077700
Medtr8g014500 match Glyma.15G019800
Medtr2g024290 match Glyma.15G111300
Medtr1g021845 match Glyma.17G247800
Medtr5g019040 match Glyma.17G247800
Medtr8g078300 match Glyma.17G247800
Medtr7g079320 match Glyma.18G239600
Medtr7g029650 match Glyma.19G088300
Medtr3g080050 match Glyma.20G054500
Medtr8g078300 match Glyma.01G179100

## Sheet: TableS3
Table S3. The cis-element of soybean LysM-RLK gene promoters.
		Plant hormones					Plant development									Environmental stress				Others
Gene ID	Gene name	gibberellin	auxin	abscisic acid	salicylic acid	MeJA	flavonoid biosynthetic genes regulation	phytochrome down-regulation expression	circadian control	zein metabolism regulation	seed-specific regulation	meristem expression	endosperm expression	endosperm-specific negative expression	element involved in differentiation palisade mesophyll cells	drought-inducibility	anaerobic induction	low-temperature responsiveness	defense and stress responsiveness	60K protein binding site	AT-rich DNA binding protein (ATBP-1)	maximal elicitor-mediated activation (2copies)	protein binding site	MYBHv1 binding site
Glyma.11G063200	GmLYK4c	1				4						2												1
Glyma.01G179000	GmLYK4b	2		1													1							1
Glyma.02G059700	GmLYK4a	4	1	1		2				1		1					4		1					1
Glyma.02G269600	GmLYK5	1		1								1				1	3		2		1			1
Glyma.17G247800	GmLYK4d	2		5		2			1			1					1		2	1				1
Glyma.14G077700	GmLYK4e					6							1			1	2		1
Glyma.19G088300	GmLYK2a	2			2	2						1	2			1	3	1
Glyma.11G196800	GmLYK2b		2															1				1
Glyma.12G077500	GmLYK2c	1		2		4						3					1	2				1
Glyma.02G000400	GmLYK8		1	3	1	2										1	2	1					1
Glyma.11G063100	GmNFR5α	1	1	4		2				1	1				1	4	2		2
Glyma.01G179100	GmNFR5β	3		4		6			1			1					1							1
Glyma.02G270800	GmNFR1α	2	3	2		2			1								3	2	1					1
Glyma.14G046200	GmNFR1β	1	1	1		2											2	2						1
Glyma.20G054500	GmLYK1b		1	2	1	2				2	1	1	1			2	3					1
Glyma.02G270700	GmLYK1c				2		1			1		1					3		1	1
Glyma.15G111300	GmLYK1a	1	2	3	1	4	1	1									4	1			1
Glyma.08G283300	GmLYK3f	1	1	1												2	5		1
Glyma.01G027100	GmLYK3e	1	1									1	1	1			5
Glyma.07G015300	GmLYK3a	1				4															1
Glyma.08G200800	GmLYK3b	2		1		2				1						1	1
Glyma.15G019800	GmLYK3c					4				1							1	1
Glyma.13G354400	GmLYK3d			1		8				2							2		1			1	1
Glyma.13G358900	GmLYK6			1		2	1			1		1								2	1
Glyma.18G239700	GmLYK7a		1							1						2					1
Glyma.09G253200	GmLYK7c	1	1	1								1					4	1	1		1
Glyma.18G239600	GmLYK7b		1	2	2	2			1	1			1			2	2		1

## Sheet: TableS4
Table S4. Primer list for RT-qPCR.
gene name	Forward primer ( 5'-3')	Reverse primer ( 5'-3')
GmLYK4c	CCTCTTGAGTTACTTGGTG	GGTGGACTAATGCGTTGAGT
GmLYK4b	CTCAGTGGTAGTAGGGTCCA	CAAATCACCGTTAATCACAC
GmLYK4a	GCGGTGCTTGACGAGGA	CTCGTGCATGTCAGGTCGACT
GmLYK5	ACTGCAACAACGAATACAACTC	TGGACTTTGATGGTGTAGGAG
GmLYK4d	GCCTCAACAAATCCTGCCTG	GTCCCTTGTTAAGCAAGA
GmLYK4e	GGAAAGAGGTGATTGTCC	CACGCATGAGGGTATCACA
